# Supplementary material for: Direct carbonization of cobalt-doped NH2-MIL-53(Fe) for electrocatalysis of oxygen evolution reaction
Source: Royal Society of Chemistry journal article supplement (doi:10.1039/c5nr06626c), 2015-11-26
Supplement: c5nr06626c1.pdf [file c5nr06626c1.pdf]

## Supporting Information

# Direct Carbonization of Co-doped NH<sub>2</sub>-MIL-53(Fe) for Electrocatalysis of Oxygen Evolution Reaction

*Yujie Han<sup>a,b</sup>, Junfeng Zhai<sup>a</sup>, Lingling Zhang<sup>a,b</sup>, and Shaojun Dong<sup>a,b</sup>✉*

*<sup>a</sup>State Key Laboratory of Electroanalytical Chemistry, Changchun Institute of Applied Chemistry,*

*Chinese Academy of Sciences, Changchun, Jilin, 130022 (China)*

*<sup>b</sup>University of Chinese Academy of Sciences, Beijing, 100049 (China)*

E-mail: [dongsj@ciac.ac.cn](mailto:dongsj@ciac.ac.cn)

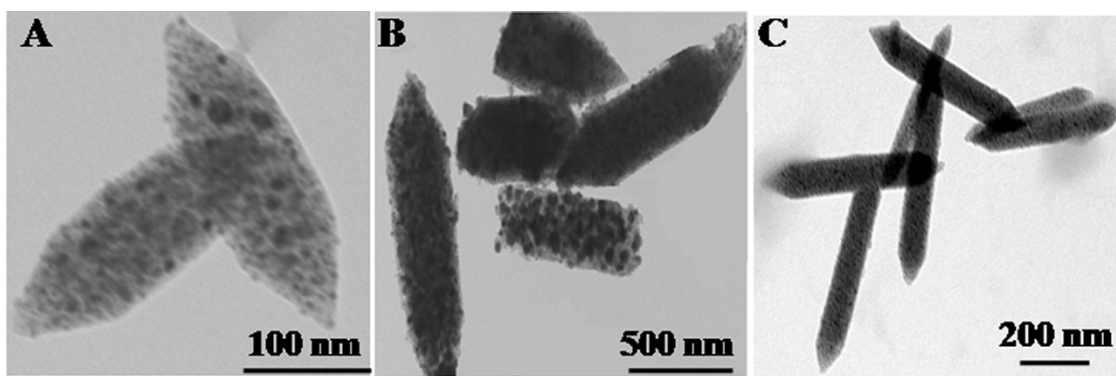

Figure S1 TEM images of (A) MOF( $\text{Fe}_3\text{-Co}_1$ ), (B) MOF( $\text{Fe}_1\text{-Co}_1$ ), and (C) MOF( $\text{Fe}_1\text{-Co}_3$ ) calcinated at 550 °C in  $\text{N}_2$  atmosphere.

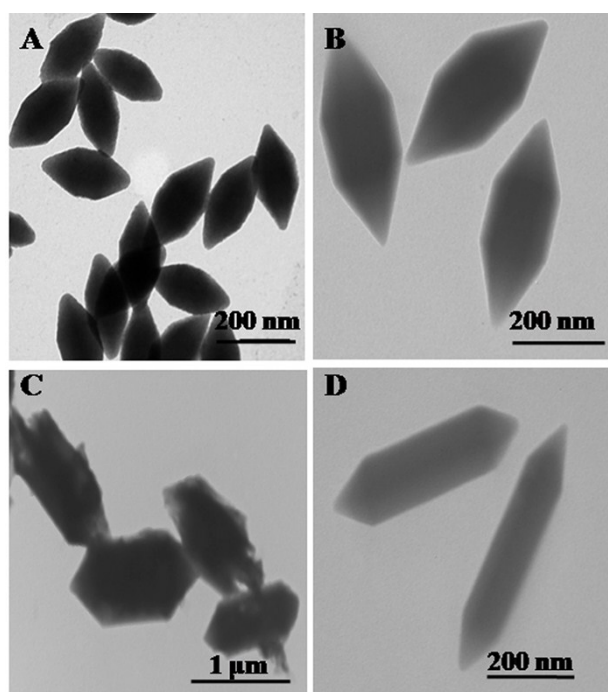

Figure S2 TEM images of (A)  $\text{NH}_2\text{-MIL-53(Fe)}$ , (B) MOF( $\text{Fe}_3\text{-Co}_1$ ), (C) MOF( $\text{Fe}_1\text{-Co}_1$ ), and (D) MOF( $\text{Fe}_1\text{-Co}_3$ ).

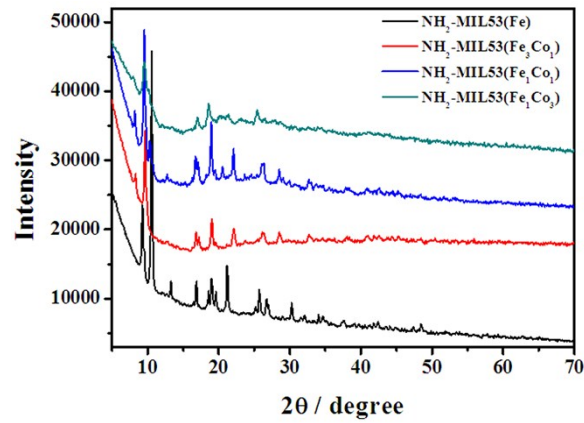

Figure S3 XRD patterns of  $\text{NH}_2\text{-MIL-53(Fe)}$  (black line),  $\text{NH}_2\text{-MIL-53(Fe}_3\text{Co}_1)$  (red line),  $\text{NH}_2\text{-MIL-53(Fe}_1\text{Co}_1)$  (blue line), and  $\text{NH}_2\text{-MIL-53(Fe}_1\text{Co}_3)$  (green line).

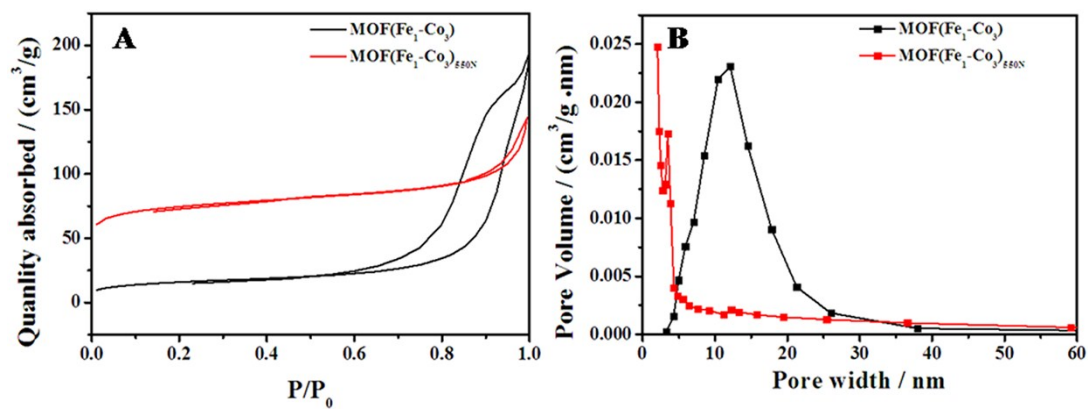

Figure S4 BET measurements: (A)  $\text{N}_2$  sorption isotherms and (B) BJH desorption pore size distributions of  $\text{MOF(Fe}_1\text{-Co}_3)$  and  $\text{MOF(Fe}_1\text{-Co}_3)_{550\text{N}}$ .

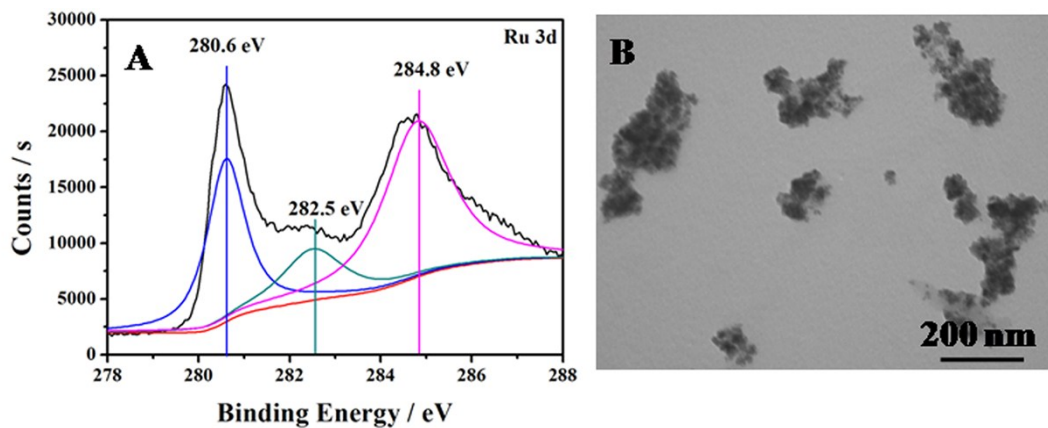

Figure S5 Deconvoluted Ru 3d XPS spectra of as-prepared RuO<sub>2</sub> (A) and TEM image of as-prepared RuO<sub>2</sub>. The deconvoluted peaks at 280.6, 282.5 and 284.3 eV are consistent with the peaks of Ru 3d<sub>5/2</sub>, Ru 3d<sub>5/2</sub> sat and Ru 3d<sub>3/2</sub>, respectively, which indicates the presence of Ru(IV). According to David J. Morgan<sup>[1]</sup>, these binding energies suggest the formation of RuO<sub>2</sub>.

#### Reference

- [1] D. J. Morgan, Surf. Interface Anal. 2015, 47, 1072–1079.
